# Supplementary material for: Sustaining clinician penetration, attitudes and knowledge in cognitive-behavioral therapy for youth anxiety
Source: Springer Nature journal article supplement (doi:10.1186/s13012-014-0089-9), 2014-07-16
Supplement: MOESM1 [file 9772710]

*Sample Questions from Knowledge Test*

1. Identify which one is not a thinking trap.
  - a. The avoider: Staying away from situations you think are scary without trying first
  - b. The mind-reader: Jumping to conclusions about a person/thing/situation without the facts
  - c. The shoulds: I should always be perfect, I shouldn't make mistakes
  - d. The gooder: Only seeing the positive and not looking at the bad things in the situation
  
2. Progressive muscle relaxation is composed of:
  - a. Tensing and relaxing parts of your body
  - b. Taking a nap
  - c. Deep breathing
  - d. A and C
  
3. Which of the following is most true with regard to coping modeling?
  - a. Mastery modeling is preferred over coping modeling
  - b. Coping modeling increases the similarity between the observer and the model
  - c. Coping modeling includes initial difficulties (like those of the client), a strategy to overcome the difficulty, and then success
  - d. Both b and c are correct
  
4. Which of the following is not an action a youth can take to help themselves when they are feeling anxious?
  - a. Problem solving
  - b. Coping thoughts
  - c. Deep breathing
  - d. Progressive muscle relaxation
  - e. Getting mom to help them get out of the situation
  
5. When the exposure portion of the treatment begins, the therapist should
  - a. Display anxiety about exposure tasks
  - b. Show confidence in the child
  - c. Introduce the most frightening stimulus to the child
  - d. Ask the parents for guidance
