# Supplementary material for: Sustaining clinician penetration, attitudes and knowledge in cognitive-behavioral therapy for youth anxiety
Source: Springer Nature journal article supplement (doi:10.1186/s13012-014-0089-9), 2014-07-16
Supplement: MOESM3 [file 9772710]

*Sample Questions from Identification and Treatment of Anxious Youth - Revised*

Treatment of Anxious Youth

1. During this last year, what has your average child/adolescent caseload been per week?
2. What percentage of your average weekly child/adolescent caseload involves anxious youth between the ages of 7 and 17?
3. Of the anxious youth you treated, what percentage did you treat with CBT?
4. Rate how extensively, on average, the following components of CBT for youth anxiety were used with all anxious youth you treated:

|        |          |   |                  |   |               |   |
|--------|----------|---|------------------|---|---------------|---|
| 0      | 1        | 2 | 3                | 4 | 5             | 6 |
| No use | Some use |   | Considerable use |   | Extensive use |   |

- a. Identification and management of somatic arousal
- b. Identification of anxious thoughts/self-talk and cognitive restructuring/changing self-talk
- c. Problem-solving
- d. Imaginal exposures
- e. Behavioral exposures
- f. Positive reinforcement
